# Supplementary material for: A comparison of nucleosome organization in Drosophila cell lines
Source: PubMed Central journal article supplement (PMC5453549; doi:10.1371/journal.pone.0178590), 2017-06-01

# Supplemental Figure 2

**A**

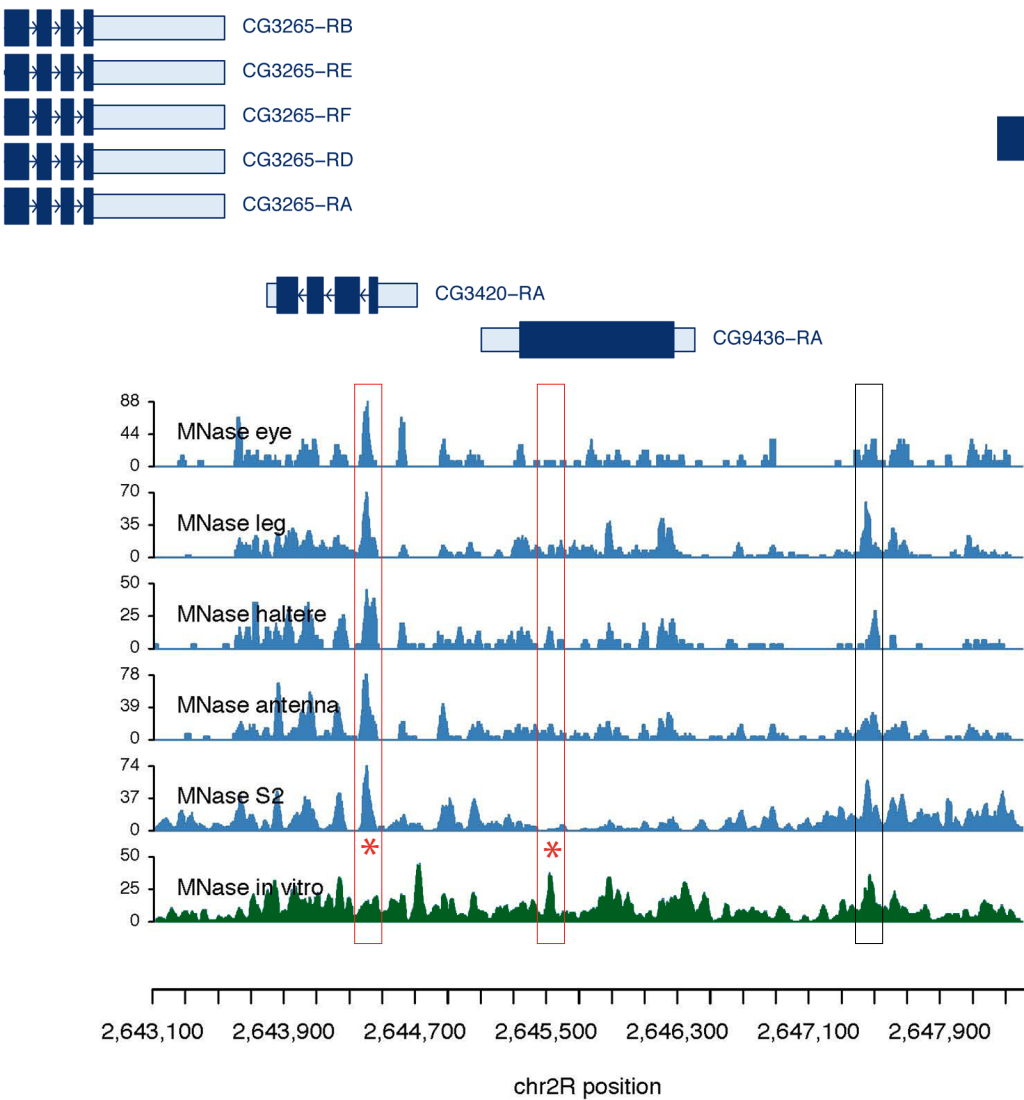

**B**

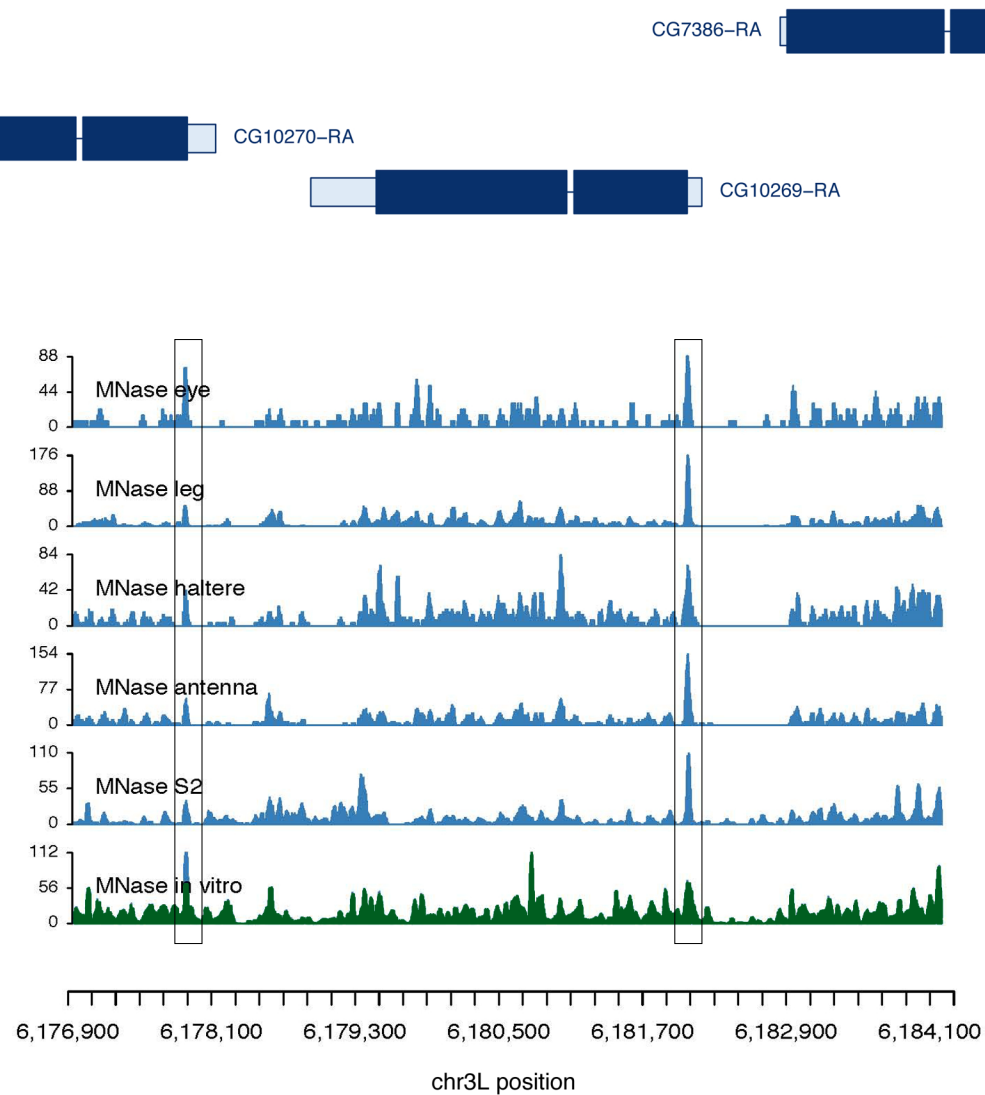

Supplement: pone.0178590.s002.pdf [file pone.0178590.s002.pdf]
